# Supplementary material
Source: publisher site journal article supplement (https://www.dovepress.com/article/337681)
Supplement: Supplementary file 1 [file get_supplementary_file.php]

**Online supplemental table 1** Characteristics of SNPs in ischemic stroke and its subtypes from a previously published GWAS data set

|  |  |  |  | Effect on stroke | |  | Effect on MI | |  |
| --- | --- | --- | --- | --- | --- | --- | --- | --- | --- |
| SNPs | Nearby gene | EA/OA | EAF | Beta | SE | *p* value | Beta | SE | *p* value |
| All ischemic stroke | |  |  |  |  |  |  |  |  |
| rs2758612 | PMF1 | C/T | 0.355 | −0.0653 | 0.0111 | 3.68 × 10−09 | −0.0051 | 0.0112 | 0.649 |
| rs34311906 | ANK2 | C/T | 0.402 | 0.0649 | 0.0113 | 1.07 × 10−08 | 0.0015 | 0.0114 | 0.897 |
| rs2634074 | RP11-119H12.3 | A/T | 0.788 | −0.0941 | 0.0121 | 5.90 × 10−15 | 0.0011 | 0.0118 | 0.926 |
| rs2066864 | FGG | A/G | 0.245 | 0.0634 | 0.0115 | 3.51 × 10−08 | 0.0163 | 0.0117 | 0.164 |
| rs11242678 | LINC01394 | T/C | 0.255 | 0.0723 | 0.0114 | 2.70 × 10−10 | −0.0001 | 0.0115 | 0.994 |
| rs2107595 | HDAC9 | A/G | 0.167 | 0.0882 | 0.0132 | 2.33 × 10−11 | 0.0451 | 0.0126 | 3.5 × 10−4 |
| rs473238 | WTAPP1 | C/T | 0.867 | −0.0831 | 0.0147 | 1.65 × 10−08 | -0.0162 | 0.0155 | 0.297 |
| rs3184504 | SH2B3 | C/T | 0.528 | −0.0779 | 0.0101 | 1.23 × 10−14 | −0.0733 | 0.0117 | 3.19 × 10−10 |
| rs4942561 | LRCH1 | T/G | 0.759 | 0.0655 | 0.0116 | 1.77 × 10−08 | 0.0257 | 0.0122 | 0.036 |
| Cardioembolic stroke | |  |  |  |  |  |  |  |  |
| rs146390073 | RGS7 | T/C | 0.022 | 0.6688 | 0.1195 | 2.20 × 10−08 | −0.0005 | 0.0614 | 0.993 |
| rs2466455 | RP11-119H12.3 | T/C | 0.783 | −0.2992 | 0.0222 | 2.75 × 10−41 | 0.0035 | 0.0117 | 0.763 |
| rs7680240 | RP11-119H12.3 | C/A | 0.409 | −0.1163 | 0.0204 | 1.17 × 10−08 | 0.0017 | 0.0108 | 0.871 |
| rs12932445 | ZFHX3 | C/T | 0.181 | 0.1758 | 0.0245 | 6.88 × 10−13 | 0.0072 | 0.0133 | 0.588 |
| Large-artery stroke | |  |  |  |  |  |  |  |  |
| rs7610618 | SIAH2 | T/C | 0.013 | 0.8449 | 0.149 | 1.44 × 10−08 | 0.0559 | 0.0408 | 0.171 |
| rs2107595 | HDAC9 | A/G | 0.168 | 0.2358 | 0.0319 | 1.44 × 10−13 | 0.0451 | 0.0126 | 3.5 × 10−4 |
| rs10820405 | LINC01492 | A/G | 0.185 | −0.1812 | 0.0331 | 4.51 × 10−08 | −0.0158 | 0.0132 | 0.232 |
| rs476762 | MMP3 | A/T | 0.133 | 0.201 | 0.0353 | 1.22 × 10−08 | 0.0265 | 0.0156 | 0.089 |

**Abbreviations:** EAF, effect allele frequency; EA/OA, effect allele/other allele; GWAS, genome-wide association study; SNPs, single-nucleotide polymorphisms; SE, standard error

**Online supplemental table 2** Characteristics of SNPs in previously published myocardial infarction GWAS data set

|  |  |  |  | Effect on MI | |  | Effect on stroke | |  |
| --- | --- | --- | --- | --- | --- | --- | --- | --- | --- |
| SNPs | Nearby gene | EA/OA | EAF | Beta | SE | *p* value | Beta | SE | *p* value |
| rs35700460 | MIA3 | G/A | 0.647 | 0.0818 | 0.0122 | 1.91 × 10−11 | 0.0095 | 0.0121 | 0.431 |
| rs9970807 | PLPP3 | T/C | 0.084 | -0.1106 | 0.0184 | 1.81 × 10−09 | −0.0354 | 0.0181 | 0.051 |
| rs7528419 | CELSR2 | G/A | 0.202 | −0.1013 | 0.0126 | 9.92 × 10−16 | −0.0128 | 0.0121 | 0.291 |
| rs72934535 | NBEAL1 | C/T | 0.093 | 0.1411 | 0.0186 | 3.36 × 10−14 | −0.0588 | 0.0165 | 3.61 × 10−04 |
| rs72689147 | GUCY1A1 | T/G | 0.18 | −0.0735 | 0.0130 | 1.65 × 10−08 | −0.0259 | 0.0125 | 0.039 |
| rs9349379 | PHACTR1 | G/A | 0.411 | 0.131 | 0.0106 | 9.37 × 10−35 | −0.0081 | 0.0105 | 0.440 |
| rs186696265 | RP1-155D22.1 | T/C | 0.013 | 0.5299 | 0.0526 | 7.24 × 10−24 | 0.0383 | 0.0556 | 0.491 |
| rs10947786 | KCNK5 | A/G | 0.208 | −0.0719 | 0.0128 | 1.77 × 10−08 | −0.0307 | 0.0120 | 0.011 |
| rs10455872 | LPA | G/A | 0.054 | 0.2848 | 0.0266 | 9.23 × 10−27 | 0.0383 | 0.0215 | 0.075 |
| rs2327426 | TARID | C/T | 0.298 | −0.0625 | 0.0110 | 1.22 × 10−08 | 0.0083 | 0.0110 | 0.449 |
| rs11556924 | ZC3HC1 | T/C | 0.298 | −0.0689 | 0.0126 | 4.00 × 10−08 | −0.0009 | 0.0111 | 0.936 |
| rs4977574 | CDKN2B-AS1 | G/A | 0.482 | 0.1887 | 0.0103 | 4.58 × 10−75 | 0.0504 | 0.0100 | 4.46 × 10−07 |
| rs1332329 | LIPA | C/A | 0.362 | 0.0791 | 0.0108 | 2.68 × 10−13 | 0.0329 | 0.0106 | 0.002 |
| rs1870634 | CXCL12 | G/T | 0.618 | 0.0697 | 0.0107 | 8.35 × 10−11 | −0.0058 | 0.0114 | 0.609 |
| rs2505083 | JCAD | C/T | 0.395 | 0.0612 | 0.0106 | 6.93 × 10−09 | 0.0242 | 0.0104 | 0.020 |
| rs2019090 | PDGFD | T/A | 0.642 | −0.0655 | 0.0111 | 3.65 × 10−09 | 0.021 | 0.0109 | 0.055 |
| rs653178 | ATXN2 | T/C | 0.558 | −0.0771 | 0.0116 | 2.84 × 10−11 | −0.0767 | 0.0104 | 1.58 × 10−13 |
| rs2681472 | ATP2B1 | G/A | 0.194 | 0.0727 | 0.0125 | 6.11 × 10−09 | −0.0288 | 0.0136 | 0.035 |
| rs4773141 | COL4A1 | G/C | 0.345 | 0.0802 | 0.0129 | 4.69 × 10−10 | 0.0115 | 0.0125 | 0.356 |
| rs7173743 | MORF4L1 | C/T | 0.432 | −0.064 | 0.0104 | 7.75 × 10−10 | −0.0091 | 0.0102 | 0.370 |
| rs429358 | APOE | C/T | 0.124 | 0.0962 | 0.0169 | 1.37 × 10−08 | −0.0006 | 0.0145 | 0.966 |
| rs41290120 | NECTIN2 | A/G | 0.032 | −0.1857 | 0.0312 | 2.62 × 10−09 | −0.0385 | 0.0259 | 0.138 |
| rs113113862 | SMARCA4 | A/G | 0.218 | −0.0754 | 0.0127 | 2.78 × 10−09 | −0.0397 | 0.0118 | 0.001 |
| rs28451064 | KCNE2 | A/G | 0.119 | 0.1223 | 0.0178 | 6.10 × 10−12 | −0.0319 | 0.0157 | 0.042 |
| rs180803 | POM121L9P | T/G | 0.028 | −0.1866 | 0.0316 | 3.66 × 10−09 | −0.1151 | 0.0682 | 0.092 |

**Abbreviations:** EAF, effect allele frequency; EA/OA, effect allele/other allele; GWAS, genome-wide association study; SNPs, single-nucleotide polymorphisms; SE, standard error
